# Supplementary material for: An Intensified Regimen Containing Linezolid Could Improve Treatment Response in Mycobacterium abscessus Lung Disease
Source: Hindawi journal article supplement (doi:10.1155/2019/8631563), 2019-11-19
Supplement: f1 [file 8631563.f1.pdf]

Supplementary Appendix  
Table S1

| PARAMETER                                           | GRADE 1<br>MILD                                                                                        | GRADE 2<br>MODERATE                                                                                        | GRADE 3<br>SEVERE                                                                                                                   | GRADE 4<br>POTENTIALLY<br>LIFETHREATENING                                            |
|-----------------------------------------------------|--------------------------------------------------------------------------------------------------------|------------------------------------------------------------------------------------------------------------|-------------------------------------------------------------------------------------------------------------------------------------|--------------------------------------------------------------------------------------|
| WBC, Decreased<br>(cells/mm <sup>3</sup> ; cells/L) | 2,000 to 2,499                                                                                         | 1,500 to 1,999                                                                                             | 1,000 to 1,499                                                                                                                      | < 1,000                                                                              |
| ALT or SGPT,<br>High                                | 1.25 to < 2.5<br>x ULN                                                                                 | 2.5 to < 5.0 x ULN                                                                                         | 5.0 to < 10.0 x<br>ULN                                                                                                              | ≥ 10.0 x ULN                                                                         |
| Nausea                                              | Transient (< 24<br>hours) or<br>intermittent AND<br>No or minimal<br>interference with<br>oral intake  | Persistent nausea<br>resulting in<br>decreased<br>oral intake for 24 to<br>48 hours                        | Persistent nausea<br>resulting in<br>minimal<br>oral intake for ><br>48 hours OR<br>Rehydration<br>indicated<br>(e.g., IV fluids)   | Life-threatening<br>consequences (e.g.,<br>hypotensive shock)                        |
| Vomiting                                            | Transient or<br>intermittent AND<br>No or minimal<br>interference with<br>oral intake                  | Frequent episodes<br>with no or mild<br>dehydration                                                        | Persistent<br>vomiting resulting<br>in orthostatic<br>hypotension OR<br>Aggressive<br>rehydration<br>indicated (e.g., IV<br>fluids) | Life-threatening<br>consequences (e.g.,<br>hypotensive shock)                        |
| Creatinine, High                                    | 1.1 to 1.3 x ULN                                                                                       | > 1.3 to 1.8 x ULN<br>OR Increase of > 0.3<br>mg/dL above<br>baseline                                      | > 1.8 to < 3.5<br>x ULN OR<br>Increase<br>of 1.5 to < 2.0 x<br>above baseline                                                       | ≥ 3.5 x ULN OR<br>Increase of ≥ 2.0 x<br>above baseline                              |
| Hemoglobin, Low<br>(mmol/L)                         | male, 10.0 to<br>10.9<br>female, 9.5 to<br>10.4                                                        | male, 9.0 to < 10.0<br>female, 8.5 to < 9.5                                                                | male, 7.0 to < 9.0<br>female, 6.5 to <<br>8.5                                                                                       | male, < 7.0<br>female, < 6.5                                                         |
| Arthralgia                                          | Joint pain causing<br>no or minimal<br>interference with<br>usual social &<br>functional<br>activities | Joint pain causing<br>greater than minimal<br>interference with<br>usual social &<br>functional activities | Joint pain causing<br>inability to<br>perform<br>usual social &<br>functional<br>activities                                         | Disabling joint pain<br>causing inability to<br>perform basic self-care<br>functions |
